# Supplementary material for: STAT3/miR-135b/NF-κB axis confers aggressiveness and unfavorable prognosis in non-small-cell lung cancer
Source: PubMed Central journal article supplement (PMC8121828; doi:10.1038/s41419-021-03773-x), 2021-05-14
Supplement: 41419_2021_3773_MOESM1_ESM.pdf [file 41419_2021_3773_MOESM1_ESM.pdf]

## Supplementary Tables

**Table S1. Clinicopathological characteristics of patients**

| <b>Characteristics</b>        | <b>No. (%)</b> |
|-------------------------------|----------------|
| <b>Gender</b>                 |                |
| Male                          | 48 (37.5)      |
| Female                        | 80 (62.5)      |
| <b>Age(years)</b>             |                |
| <60                           | 65 (50.78)     |
| >=60                          | 63 (49.22)     |
| <b>Smoke</b>                  |                |
| Yes                           | 52 (40.63)     |
| NO                            | 76 (59.38)     |
| <b>T classification</b>       |                |
| T1                            | 75 (58.59)     |
| T2                            | 49 (38.28)     |
| T3                            | 2 (1.56)       |
| T4                            | 2 (1.56)       |
| <b>N classification</b>       |                |
| N0                            | 80 (62.50)     |
| N1                            | 7 (5.47)       |
| N2                            | 41 (32.03)     |
| <b>M classification</b>       |                |
| M0                            | 127 (99.22)    |
| M1                            | 1 (0.78)       |
| <b>Clinical stage</b>         |                |
| I                             | 75 (58.59)     |
| II                            | 11 (8.59)      |
| III                           | 41 (32.03)     |
| IV                            | 1 (0.78)       |
| <b>Patient survival</b>       |                |
| Alive                         | 99 (77.34)     |
| Deceased                      | 29 (22.66)     |
| <b>Expression of miR-135b</b> |                |
| Low expression                | 61 (47.66)     |
| High expression               | 67 (52.34)     |

**Table S2. DNA sequences of qRT-PCR primers**

| <b>Primer name</b> | <b>Sequence</b>          |
|--------------------|--------------------------|
| GAPDH_Fwd          | GAAGGTGAAGGTCGGAGTCA     |
| GAPDH_Rev          | TTGAGGTCAATGAAGGGGTC     |
| Bcl-2_Fwd          | GACTGAGTACCTGAACCGGC     |
| Bcl-2_Rev          | CAGCCAGGAGAAATCAAACAG    |
| Bcl-xL_Fwd         | GTATTGGTGAGTCGGATCGC     |
| Bcl-xL_Rev         | TGCTGCATTGTTCCCATAGA     |
| MMP9_Fwd           | GGGACGCAGACATCGTCATC     |
| MMP9_Rev           | TCGTCATCGTCGAAATGGGC     |
| A20_Fwd            | GCGTTCAGGACACAGACTTG     |
| A20_Rev            | TTCATCATTCCAGTTCCGAGTATC |
| NFKBIA_Fwd         | GTCAAGGAGCTGCAGGAGAT     |
| NFKBIA_Rev         | TCATGGATGATGGCCAAGT      |
| VEGFC_Fwd          | GTGTCCAGTGTAGATGAACTC    |
| VEGFC_Rev          | ATCTGTAGACGGACACACATG    |
| IL-1 $\beta$ _Fwd  | AGCTGATGGCCCTAAACAGA     |
| IL-1 $\beta$ _Rev  | CCTGAAGCCCTTGCTGTAGT     |
| IL-6_Fwd           | AGTGAGGAACAAGCCAGAGC     |
| IL-6_Rev           | CATTTGTGGTTGGGTCAGG      |
| IL-8_Fwd           | CGGAAGGAACCATCTCACTG     |
| IL-8_Rev           | AGCACTCCTTGGCAAAACTG     |

**Table S3. Correlation between the clinicopathological features and expression of miR-135b**

| Characteristics         | miR-135b expression |      | $\chi^2$ Test<br><i>P</i> -Value | Fisher Exact<br>Test <i>P</i> -Value |
|-------------------------|---------------------|------|----------------------------------|--------------------------------------|
|                         | Low                 | High |                                  |                                      |
| <b>Gender</b>           |                     |      |                                  |                                      |
| Male                    | 24                  | 24   | 0.717                            | -                                    |
| Female                  | 37                  | 43   |                                  |                                      |
| <b>Age(years)</b>       |                     |      |                                  |                                      |
| <60                     | 26                  | 39   | 0.111                            | -                                    |
| >=60                    | 35                  | 28   |                                  |                                      |
| <b>Smoke</b>            |                     |      |                                  |                                      |
| Yes                     | 28                  | 24   | 0.041                            |                                      |
| NO                      | 33                  | 43   |                                  |                                      |
| <b>T classification</b> |                     |      |                                  |                                      |
| T1                      | 40                  | 35   | -                                | 0.438                                |
| T2                      | 19                  | 30   |                                  |                                      |
| T3                      | 1                   | 1    |                                  |                                      |
| T4                      | 1                   | 1    |                                  |                                      |
| <b>N classification</b> |                     |      |                                  |                                      |
| N0                      | 34                  | 46   | -                                | 0.244                                |
| N1                      | 5                   | 2    |                                  |                                      |
| N2                      | 22                  | 19   |                                  |                                      |
| <b>M classification</b> |                     |      |                                  |                                      |
| M0                      | 61                  | 66   | -                                | 1.000                                |
| M1                      | 0                   | 1    |                                  |                                      |
| <b>Clinical stage</b>   |                     |      |                                  |                                      |
| I                       | 32                  | 43   | -                                | 0.165                                |
| II                      | 8                   | 3    |                                  |                                      |
| III                     | 21                  | 20   |                                  |                                      |
| IV                      | 0                   | 1    |                                  |                                      |

## Supplementary Figure Legends

### Figure S1 Verification of miR-135b stably up- or downregulated NSCLC cell

lines. (A) Real-time PCR measuring miR-135b level in miR-135 overexpressing cells.

(B) Real-time PCR measuring miR-135b level in miR-135 inhibiting cells. Error bars represent the mean  $\pm$ SD. \*\*,  $p < 0.01$ ; \*\*\*,  $p < 0.001$ , two-tailed, unpaired t-test.

### Figure S2 miR-135b promotes cell migration, invasion, anti-apoptosis and

angiogenesis in NSCLC *in vitro*. (A, B) Quantification of migrated (A) and invaded

(B) cells in the indicated cell lines, related to Figure 3A-B. (C) Quantification of

TUNEL positive cells in the indicated cell lines, related to Figure 3C. (D)

Representative images of cells treated with cisplatin (DDP) taken under a bright field microscope. Scale bars, 50 $\mu$ m. (E) Western blotting analysis of the protein levels of

PARP and cleaved-PARP in the indicated cells.  $\beta$ -Tubulin served as a loading control.

(F) Quantification of migrated HUVECs, related to Figure 3D. Error bars represent the mean  $\pm$ SD. \*,  $p < 0.05$ ; \*\*,  $p < 0.01$ ; \*\*\*,  $p < 0.001$ , two-tailed, unpaired t-test.

### Figure S3 miR-135b promotes nuclear translocation of NF- $\kappa$ B/p65.

Representative images (A) and quantification (B) of p65 nuclear positive cells in

indicated cells, related to Figure 4G. Scale bars, 20 $\mu$ m. Error bars represent the mean

$\pm$ SD. \*,  $p < 0.05$ ; \*\*,  $p < 0.01$ ; \*\*\*,  $p < 0.001$ , two-tailed, unpaired t-test.

### Figure S4 Rescuing the expression of CYLD reversed the effects of miR-135b on

cellular behaviors. (A) Quantification of EdU positive cells in indicated cell lines,

related to Figure 6B. (B, C) Quantification of migrated (B) and invaded (C) cells in

indicated cell lines, related to Figure 6C-D. (D) Quantification of TUNEL positive

cells in indicated cell lines, related Figure 6E. Error bars represent the mean  $\pm$ SD. \*,

$p < 0.05$ ; \*\*,  $p < 0.01$ ; \*\*\*,  $p < 0.001$ , two-tailed, unpaired t-test.
